# Supplementary material for: A remarkably simple genome underlies highly malignant pediatric rhabdoid cancers
Source: JCI journal article supplement (doi:10.1172/jci64400), 2012-07-16
Supplement: sd1 [file 1]

## **Supplementary Materials:**

Materials and Methods

Figures S1-S7

Tables S1-S12

## **Supplementary Materials:**

### **Supplementary Methods**

#### **ABSOLUTE and Multiplicity**

We used the ABSOLUTE method to analyze mutant allele fractions, taking into account local SCNAs and tumor purity to estimate the fraction of cancer cells containing the mutant allele, as well as the average number of alternate alleles per tumor cell (multiplicity). In addition, ABSOLUTE classified mutations as homozygous in cases with complete loss of the reference allele in the cancer cell population.

Multiplicity is a measure of the average number of alternate alleles per tumor cell for each site of somatic variation, and is estimated from the mutation AF, the local somatic copy number, and the tumor purity and ploidy (1). A multiplicity at the level of unity or above represents a clonal mutation while values less than 1 indicate that the mutation is subclonal. Each mutation was classified as clonal or sub-clonal according to the probability that the observed multiplicity was consistent with or exceeded unit multiplicity.

#### **Whole Exome Capture Library Construction**

Library construction followed the procedure previously detailed in previous publications (2-5). Exome targets were generated based on CCDS + RefSeq genes (<http://www.ncbi.nlm.nih.gov/projects/CCDS/> and <http://www.ncbi.nlm.nih.gov/RefSeq/>), representing 188,260 exons from ~18,560 genes (93% of known, non-repetitive protein coding genes) and spanning ~1% of the genome (32.7 Mb). Genomic DNA from primary tumor and patient-matched blood normal was sheared, ligated to Illumina sequencing adapters, and selected for lengths between 75-300 bp. This “pond” of DNA was hybridized with an excess of biotinylated RNA “baits” in solution. The “catch” was pulled down by magnetic beads coated with streptavidin and eluted as described previously (6,7). Sequencing libraries were quantified using a SYBR Green qPCR protocol with specific probes complementary to adapter sequence. Based on the qPCR quantification, libraries were normalized to 2 nM and then denatured using 0.1 N NaOH. Cluster amplification of denatured templates was performed according to manufacturer’s protocol (Illumina) using V3 Chemistry and V3 Flowcells. SYBR Green dye was added to all flowcell lanes to provide a quality control checkpoint after cluster amplification and to ensure optimal cluster densities on the flowcells. Barcoded exon capture libraries were then pooled into batches of 96 samples and sequenced on Illumina HiSeq instrument (76 bp paired-end reads) (6). The 8 bp barcode index was read by the instrument at the beginning of read 2 and used to distribute sequencing reads to sample in the downstream data aggregation. Standard quality control metrics—including error rates, % passing filter reads, and total Gb produced—

were used to characterize process performance prior to downstream analysis. The median coverage achieved across all exome samples in the data set was 90X for tumor and 86.5X for normal samples.

### **Sequence data processing**

Massively parallel sequencing data were processed using two consecutive pipelines:

(1) The sequencing data processing pipeline, called “Picard”, developed by the Sequencing Platform at the Broad Institute, starts with the reads and qualities produced by the Illumina software for all lanes and libraries generated for a single sample (either tumor or normal) and produces, at the end of the pipeline, a single BAM file (<http://samtools.sourceforge.net/SAM1.pdf>) for each tumor and matched normal sample. The final BAM file stores all reads with re-calibrated qualities together with their alignments to the genome (only for reads that were successfully aligned).

(2) The Broad Cancer Genome Analysis pipeline, also known as “Firehose”, starts with the BAM files for the tumor and matched normal samples and performs various analyses, including quality control, local realignment, mutation calling, small insertion and deletion identification, rearrangement detection, coverage calculations and others (see details below).

Several of the tools used in these pipelines were developed jointly by the Broad Institute Sequencing Platform, Medical and Population Genetics Program and the Cancer Program. Additional details regarding parts of the pipeline focused on germline events (typically employed for medical and population genetics studies) are described elsewhere (8).

### **The sequencing data-processing pipeline (“Picard pipeline”)**

We generated a BAM file for each sample using the sequencing data processing pipeline known as “Picard” (<http://picard.sourceforge.net/>). Picard consists of four steps, described in detail in Chapman, M.A. *et al.* (3), but with the following modifications in the “Alignment to the genome” step: Alignment was performed using BWA (<http://bio-bwa.sourceforge.net/>) to the NCBI Human Reference Genome GRCh37 (9).

The reads in the BAM file were sorted according to their chromosomal position. Unaligned reads were also stored in the BAM file such that all reads that passed the Illumina purity filter were kept in the BAM. Duplicate reads were marked such that only unique sequenced DNA fragments were used in subsequent analysis.

**Local realignment.** Sequence reads corresponding to genomic regions that may harbor small insertions or deletions (indels) were jointly realigned to improve detection of indels and to decrease the number of false positive single nucleotide variations caused by misaligned reads, particularly at the 3’ end (8). In order to improve the efficiency of this step, we performed a joint local-realignment of all samples from a same individual (“co-cleaning”). Briefly, all sites potentially harboring small insertions or deletions in either the tumor or the matched normal were realigned in all samples.

### **The Cancer Genome Analysis Pipeline (“Firehose”)**

The Cancer Genome Analysis pipeline consists of a set of tools for analyzing massively parallel sequencing data representing tumor DNA samples and their matched normal DNA samples. Firehose is a pipeline infrastructure that manages the input files, analysis tools and the output files; and keeps track of data file locations, analysis “jobs” awaiting execution, priority of

analytical tasks, and analyses in progress. The pipeline also coordinates versioning and logging of the specific analytical parameters that generated a given result. Firehose uses GenePattern(10) as its execution engine, which executes pipelines and modules based on specific parameters and inputs files specified by Firehose. The pipeline contains the following steps:

**Quality control.** We ensured that all data matched their corresponding patient and that there were no mix-ups between tumor and normal data for the same individual. When available, DNA copy-number profiles as well as genotypic information collected from SNP arrays were also included in Firehose. Genotypes derived from the sequencing data and/or SNP arrays were compared between samples from a same individual (tumor / normal) to ensure identity. Genotypes from the SNP arrays also allowed an estimate of cross-contamination between samples from different individuals using the ConTest algorithm (11). By studying the copy number profile of the tumor lanes, we were able to detect samples with various levels of DNA copy-number alterations or a noisy coverage.

**Identification of somatic single nucleotide variations (SNVs).** Candidate somatic SNVs were detected using a statistical analysis of the bases and qualities in the tumor and normal BAMs that mapped to the genomic locus being examined. For WGS data we interrogated every position along the genome, and for WES data, we searched for mutations in the neighborhood of the targeted exons (where the majority of reads are located). We also indicated for every analyzed base whether it was sufficiently covered for confident identification of point mutations (2-5). In brief, the somatic SNV detection consists of three steps:

(i) Preprocessing of the aligned reads in the tumor and normal sequencing data. In this step we ignore reads with too many mismatches or very low quality scores since they are likely to introduce artifacts.

(ii) A statistical analysis that identifies sites that are likely to carry somatic mutations with high confidence. The statistical analysis predicts a somatic mutation by using two Bayesian classifiers – the first aims to detect whether the tumor is non-reference at a given site and, for those sites that are found as non- reference, the second classifier makes sure the normal does not carry the variant allele. In practice the classification is performed by calculating a LOD score (log odds) and comparing it to a cutoff determined by the log ratio of prior probabilities of the considered events. For the tumors we calculate

$$\text{LOD}_{\text{Tumor}} = \log_{10} \left\{ \frac{P(\text{observed tumor data} \mid \text{site is mutated})}{P(\text{observed tumor data} \mid \text{site is reference})} \right\}$$

and for the normal samples

$$\text{LOD}_{\text{Normal}} = \log_{10} \left\{ \frac{P(\text{observed normal data} \mid \text{site is reference})}{P(\text{observed normal data} \mid \text{site is mutated})} \right\}$$

The LOD thresholds were chosen for each statistic such that our false positive rate is expected to be no more than 5%. The thresholds were  $\text{LOD}_{\text{Tumor}} > 8$  and  $\text{LOD}_{\text{Normal}} > 2.3$  to satisfy this criterion.

(iii) Post-processing of candidate somatic mutations to eliminate artifacts of next-generation sequencing, short read alignment and hybrid capture. For example, sequence context can cause hallucinated alternate alleles but often only in a single direction. Therefore, we test that the alternate alleles supporting the mutations are observed in both directions and apply a Fisher exact test with a LOD threshold of 2.

**Identification of somatic small insertions and deletions (indels).** Indels were detected by first identifying putative events within the tumor BAM file (with high sensitivity but also a high false positive rate). Afterwards, noisy events and potential germline events were filtered out using the corresponding normal data (12).

**Determination of mutation rates.** We calculated base mutation rates using both the mutations detected (SNVs and indels) and the coverage statistics. Mutations (and bases) were further partitioned into mutation categories (i) C in CpG dinucleotides mutated to a T (transition), (ii) C followed by an A, C, or T mutated to a T (transition), (iii) other C's mutated to an A or G (transversions), (iv) A or T base mutating to any other base, and (v) mutations that disrupt the genes such as frameshift indels and nonsense mutations. For these categories, we reversed complemented sequence in which the reference base was a G or T such that the SNV categories always have reference C or A bases.

**Identification of significantly mutated genes.** Genes that harbored more mutations than expected by chance were identified by comparing the observed number of mutations (from each category described above) across the samples to the expected number based on the background mutation rates and the covered bases in all samples (3-5). Covered bases were defined as bases with at least 14 reads in the tumor and 8 reads in the matched normal. For each gene, we calculated the probability of seeing the observed constellation of mutations or a more extreme one, given the background mutation rates calculated across the dataset. This is done by convoluting a set of binomial distributions, as described previously (13). This p-value is then adjusted for multiple hypotheses according to the Benjamini-Hochberg procedure for controlling False Discovery Rate (FDR) (14), obtaining a q-value. We manually reviewed all mutations and indels identified by this automated methodology by viewing the aligned reads corresponding to each individual mutation call using the Integrated Genomic Viewer (Figure S3) (15).

Approximately 20% of the detected mutations were dismissed as likely artifact based on manual review. The ranking of genes in terms of estimated conferred selective advantage was performed by using the mutation statistical analysis algorithm MutSig (Figs. S4 and S5) (2-5). The calculated likelihood for a certain number of mutations to occur by chance takes into account the base context of the mutations and the rates of those events in the set of genomes.

**Mutation annotation.** Point mutations and indels identified as described above were also annotated using publicly available databases. In brief, a local database of human genome build hg19-derived annotations compiled from multiple different public resources was used to map genomic variants to specific genes, transcripts, and other relevant features. The same data was used to predict the functional consequence (if any) a variant might have on the corresponding protein product. The set of 73,671 reference transcripts used were derived from transcripts from the UCSC Genome Browser's UCSC Genes track (16) and microRNAs from miRBase release 15 (17) as provided in the TCGA General Annotation Files (GAF) 1.0 library

(<https://wiki.nci.nih.gov/display/TCGA/RNASeq+Data+Format+Specification>). Variants were also annotated with data from the following resources: dbSNP build 132 (18), UCSC Genome Browser's ORegAnno track (16,19), UniProt release 2011\_03 (20), PolyPhen-2 (21), COSMIC v51 (22), significant results from published MutSig analyses (2-5,23,24) significant regions from Tumorscape (25) and cancer cell line genotypes from the Broad-Novartis Cancer Cell Line Encyclopedia (<http://www.broadinstitute.org/ccle>).

### ***SMARCB1* mutations**

Two tumors (08-114 and 09-223) had no detectable mutations, other than *SMARCB1* loss. MuTect identified point mutations in *SMARCB1* in seven samples, and an additional two mutations were identified upon manual review. Of the nine somatic focal mutations within *SMARCB1*, five were nonsense mutations, three were single base pair indels resulting in frameshift, and one was a 13 bp tandem duplication that led to a frameshift and truncated protein. The dRanger algorithm further detected a tandem duplication in *SMARCB1* spanning exons 3-5 of sample 09-130 (Figure S6). In addition to the somatic mutations, seven tumors were found to have germline mutations in *SMARCB1*, including three nonsense mutations, one 1bp indel, one focal deletion of the whole gene, and two splice site mutations.

The results from exome sequencing corroborated previous results from multiplex ligation-dependent probe amplification (MLPA) and Sanger sequencing for *SMARCB1* (26,27). Because *SMARCB1* status in these samples had been previously genotyped, a close manual examination of the exome sequencing data at this gene locus was done after the Firehose pipeline analysis was completed. Notably, manual examination revealed three mutations that were not identified by the Firehose pipeline. Sample 08-237 contained a 13bp tandem duplication and sample 10-155 contained a 1bp deletion that were not called as mutations (Figure S3, Table S4). In the former case, an examination of the sequence data from this sample revealed that the mutation was partially masked by software based soft clipping of the reads covering that region (Figure S7). Including the reads that were soft clipped, the allele frequency was 0.85. In the case of the 1bp deletion, the mutation occurred in a region of low coverage and only 1 of 8 reads contained the mutation. Additionally, sample 07-057 was reported to have a homozygous deletion of *SMARCB1* by FISH analysis, but this SCNA was not identified in exome sequencing analysis. The tandem duplication in sample 09-130 was not detected by MLPA. Manual reviews of *GABRB2* and *TP53* did not reveal any additional mutations in either gene that were missed by Firehose. The finding of discrepancies demonstrates that mutation detection pipelines used for cancer genome sequencing can miss mutations on a first pass, a finding with substantial potential relevance for the use of genome sequencing in a clinical setting.

### **Comparison of mutation rates**

Matlab boxplot function was used to create Figure 2B. As per Matlab: On each box, the central mark is the median, the edges of the box are the 25th and 75th percentiles, the whiskers extend to the most extreme data points not considered outliers, and outliers are plotted individually. Points are drawn as outliers if they are larger than  $[2 \times q3 - q1]$  or smaller than  $[2 \times q1 - q3]$ , where  $q1$  and  $q3$  are the 25th and 75th percentiles, respectively. The 3 recurrent RT points were added as blue circles, and the counts of samples for each dataset appears along the top. Previously published data for melanoma, ovarian carcinoma, head and neck squamous cell carcinoma, prostate carcinoma, and chronic lymphocytic leukemia were used (5,12,28-30).

#### Supplementary references

1. Carter SL, et al. Absolute quantification of somatic DNA alterations in human cancer. *Nat Biotechnol.* 2012.
2. Berger MF, et al. The genomic complexity of primary human prostate cancer. *Nature.* 2011;470(7333):214-220.
3. Chapman MA, et al. Initial genome sequencing and analysis of multiple myeloma. *Nature.* 2011;471(7339):467-472.
4. Lohr JG, et al. Discovery and prioritization of somatic mutations in diffuse large B-cell lymphoma (DLBCL) by whole-exome sequencing. *Proc Natl Acad Sci U S A.* 2012.
5. Stransky N, et al. The mutational landscape of head and neck squamous cell carcinoma. *Science (New York, NY).* 2011;333(6046):1157-1160.
6. Gnirke A, et al. Solution hybrid selection with ultra-long oligonucleotides for massively parallel targeted sequencing. *Nat Biotechnol.* 2009;27(2):182-189.
7. Fisher S, et al. A scalable, fully automated process for construction of sequence-ready human exome targeted capture libraries. *Genome Biol.* 2011;12(1):R1.
8. DePristo MA, et al. A framework for variation discovery and genotyping using next-generation DNA sequencing data. *Nat Genet.* 2011;43(5):491-498.
9. Li H, Durbin R. Fast and accurate long-read alignment with Burrows-Wheeler transform. *Bioinformatics.* 2010;26(5):589-595.
10. Reich M, Liefeld T, Gould J, Lerner J, Tamayo P, Mesirov JP. GenePattern 2.0. *Nat Genet.* 2006;38(5):500-501.
11. Cibulskis K, McKenna A, Fennell T, Banks E, DePristo M, Getz G. ContEst: estimating cross-contamination of human samples in next-generation sequencing data. *Bioinformatics.* 2011;27(18):2601-2602.
12. TCGA. Integrated genomic analyses of ovarian carcinoma. *Nature.* 2011;474(7353):609-615.
13. Getz G, et al. Comment on "The consensus coding sequences of human breast and colorectal cancers". *Science.* 2007;317(5844):1500.
14. Benjamini YH, Yosef. Controlling the False Discovery Rate: A Practical and Powerful Approach to Multiple Testing. *Journal of the Royal Statistical Society. Series B (Methodological).* 1995;57(1):289-300.
15. Robinson JT, et al. Integrative genomics viewer. *Nat Biotechnol.* 2011;29(1):24-26.
16. Fujita PA, et al. The UCSC Genome Browser database: update 2011. *Nucleic Acids Res.* 2011;39(Database issue):D876-882.
17. Kozomara A, Griffiths-Jones S. miRBase: integrating microRNA annotation and deep-sequencing data. *Nucleic Acids Res.* 2011;39(Database issue):D152-157.
18. Sherry ST, et al. dbSNP: the NCBI database of genetic variation. *Nucleic Acids Res.* 2001;29(1):308-311.
19. Griffith OL, et al. ORegAnno: an open-access community-driven resource for regulatory annotation. *Nucleic Acids Res.* 2008;36(Database issue):D107-113.
20. Consortium U. Ongoing and future developments at the Universal Protein Resource. *Nucleic Acids Res.* 2011;39(Database issue):D214-219.
21. Adzhubei IA, et al. A method and server for predicting damaging missense mutations. *Nat Methods.* 2010;7(4):248-249.
22. Forbes SA, et al. COSMIC: mining complete cancer genomes in the Catalogue of Somatic Mutations in Cancer. *Nucleic Acids Res.* 2011;39(Database issue):D945-950.

23. Ding L, et al. Somatic mutations affect key pathways in lung adenocarcinoma. *Nature*. 2008;455(7216):1069-1075.
24. TCGA. Comprehensive genomic characterization defines human glioblastoma genes and core pathways. *Nature*. 2008;455(7216):1061-1068.
25. Beroukhi R, et al. Assessing the significance of chromosomal aberrations in cancer: methodology and application to glioma. *Proc Natl Acad Sci U S A*. 2007;104(50):20007-20012.
26. Eaton KW, Tooke LS, Wainwright LM, Judkins AR, Biegel JA. Spectrum of SMARCB1/INI1 mutations in familial and sporadic rhabdoid tumors. *Pediatr Blood Cancer*. 2011;56(1):7-15.
27. Jackson EM, et al. Genomic analysis using high-density single nucleotide polymorphism-based oligonucleotide arrays and multiplex ligation-dependent probe amplification provides a comprehensive analysis of INI1/SMARCB1 in malignant rhabdoid tumors. *Clin Cancer Res*. 2009;15(6):1923-1930.
28. Barbieri CE, et al. Exome sequencing identifies recurrent SPOP, FOXA1 and MED12 mutations in prostate cancer. *Nat Genet*. 2012.
29. Berger MF, et al. Melanoma genome sequencing reveals frequent PREX2 mutations. *Nature*. 2012;485(7399):502-506.
30. Wang L, et al. SF3B1 and other novel cancer genes in chronic lymphocytic leukemia. *N Engl J Med*. 2011;365(26):2497-2506.
31. Chiang DY, et al. High-resolution mapping of copy-number alterations with massively parallel sequencing. *Nat Methods*. 2009;6(1):99-103.

**Figure S1:** SNP6.0 Array (A) Sequence read depth and (B) somatic copy number alternation profile in region of *SMARCB1* gene (red). Read depth is compared with SNP intensity (same as Figure 1B). SegSeq was used to estimate copy number from sequence read depth (31).

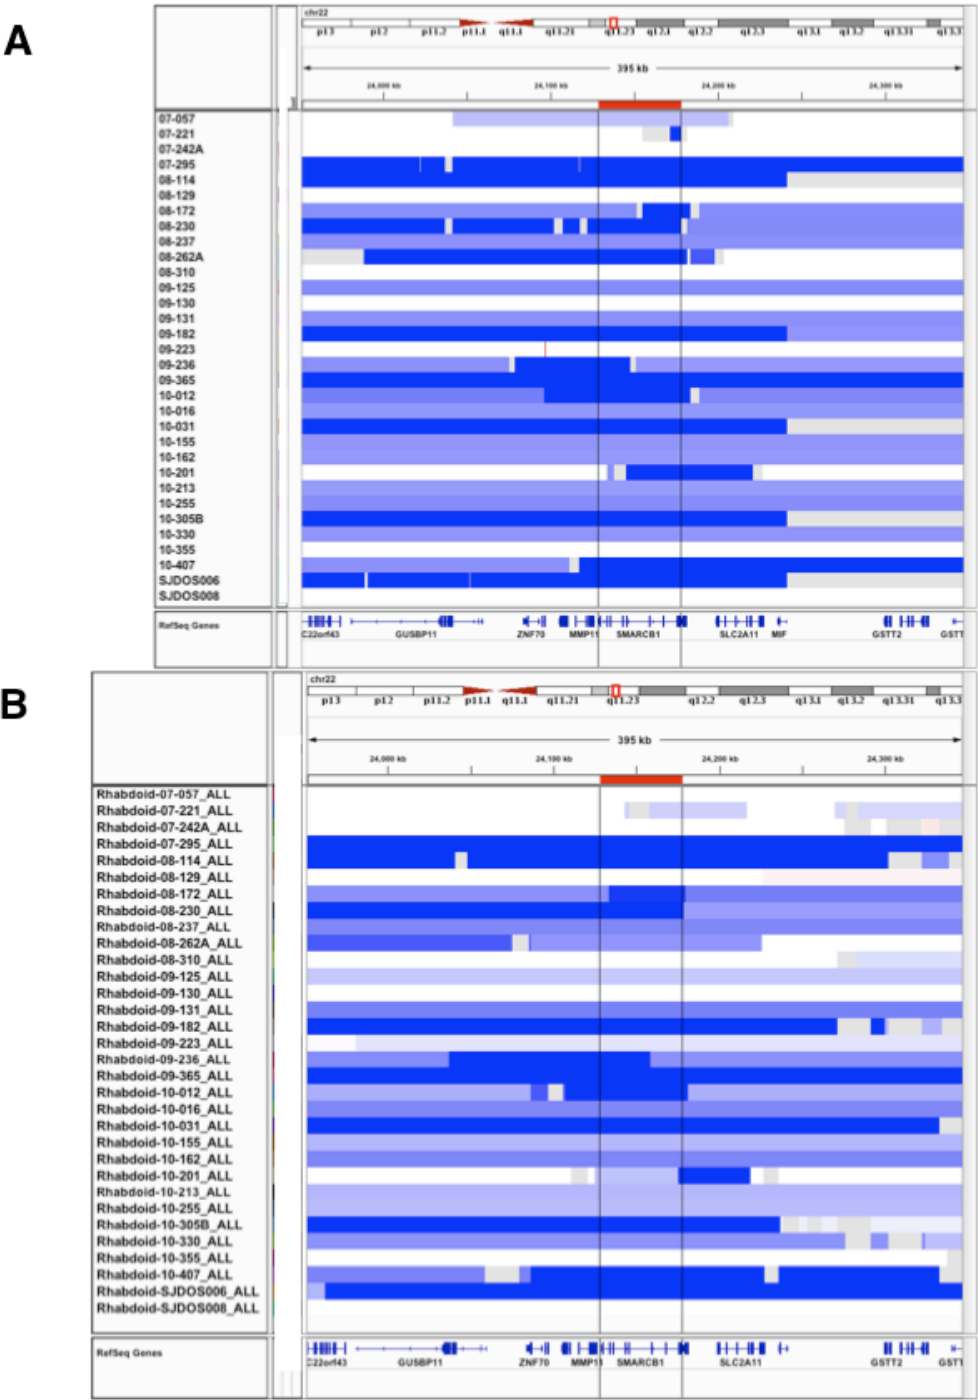



**Figure S2:** Somatic Single Nucleotide Variant spectrum with 3-base context. **(A)** Mutation rates for primary RT samples. **(B)** Mutation rates for recurrent RT samples. Colors indicate type of mutation change from reference to alternate allele where strand symmetry is folded such that all mutations are either reference C or A alleles (sequence for G and T reference alleles is reverse complemented). Each colored square shows the sequence context as labeled in the legend on the lower right.

**A**

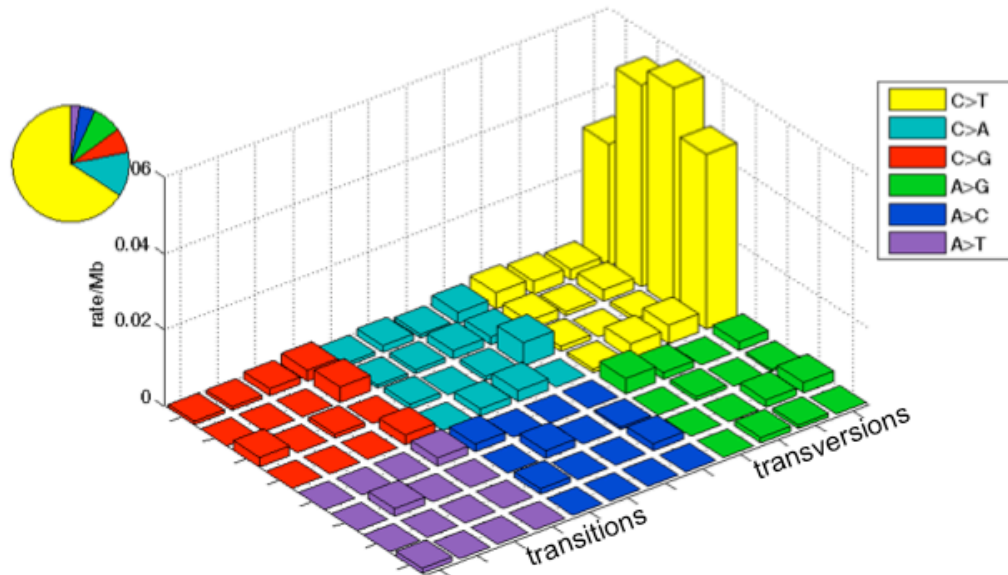

**B**

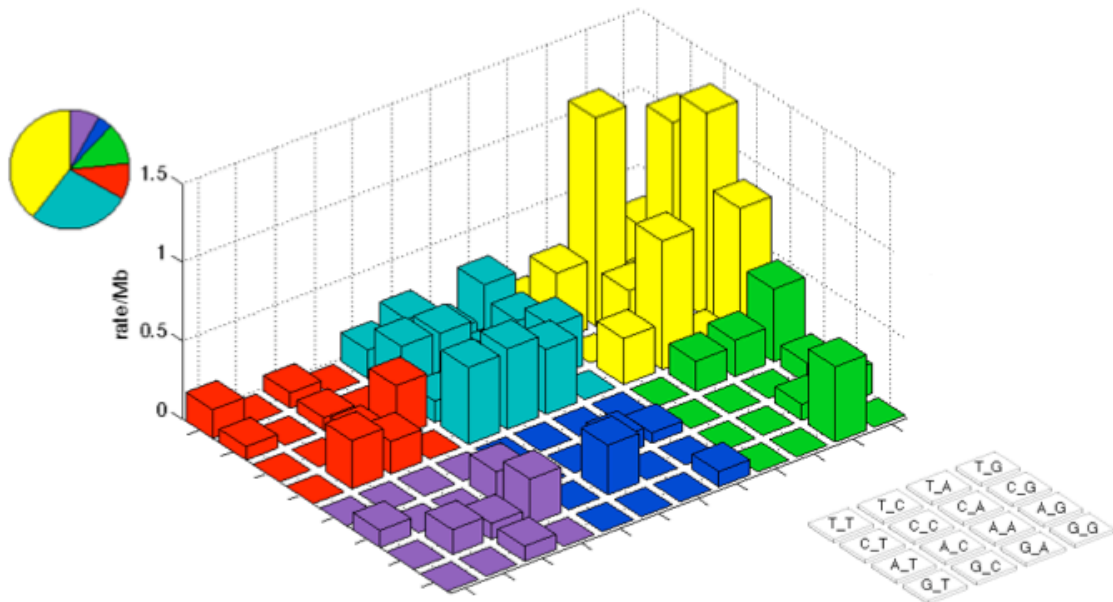

**Figure S3:** Two C>T *SMARCB1* nonsense mutations in two samples: 10-162 (top panels : tumor over matched normal) and 10-213 (bottom panels) The 10-162 mutation of found in 69 of 81 covering reads (85% allele fraction, 0.91 multiplicity). The 10-213 mutation was found in 39 of 66 covering reads (59% allele fraction, 1.10 multiplicity). No alternate alleles were found in the matched normals.

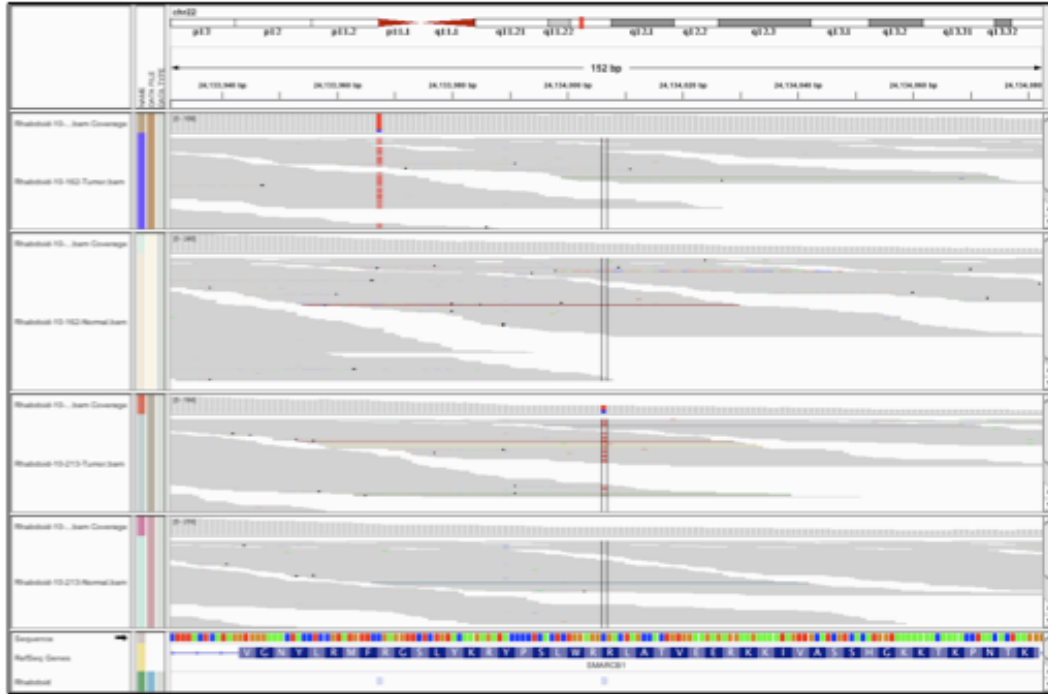

**Figure S4:** MutSig report denoting mutations that are recurrently mutated in the 32 primary diagnostic RT.

| SIGNIFICANTLY MUTATED GENES |         |                                                                                                   |       |   |      |       |      |    |    |    |    |    |           |
|-----------------------------|---------|---------------------------------------------------------------------------------------------------|-------|---|------|-------|------|----|----|----|----|----|-----------|
| rank                        | gene    | description                                                                                       | N     | n | npat | nsite | nsll | n1 | n2 | n3 | n4 | n5 | p         |
| 1                           | SMARCB1 | SWI/SNF related, matrix associated, actin dependent regulator of chromatin, subfamily B, member 1 | 28185 | 7 | 7    | 6     | 0    | 0  | 0  | 0  | 0  | 7  | <1.00e-11 |
| 2                           | GABRB2  | gamma-aminobutyric acid (GABA) A receptor, beta 2                                                 | 48142 | 2 | 2    | 2     | 0    | 2  | 0  | 0  | 0  | 0  | 0.000019  |
| 3                           | GUK1    | guanylate kinase 1                                                                                | 19438 | 1 | 1    | 1     | 0    | 0  | 1  | 0  | 0  | 0  | 0.52      |
| 4                           | IRX3    | irxopods homeobox 3                                                                               | 24091 | 1 | 1    | 1     | 0    | 0  | 0  | 0  | 0  | 1  | 0.0022    |
| 5                           | ZC3H8   | zinc finger CCHC-type containing 8                                                                | 21624 | 1 | 1    | 1     | 0    | 0  | 0  | 0  | 0  | 1  | 0.0023    |
| 6                           | ZC6B    | zinc finger CCHC-type containing 8                                                                | 18923 | 1 | 1    | 1     | 0    | 1  | 0  | 0  | 0  | 0  | 0.68      |
| 7                           | TRABD   | Trab domain containing                                                                            | 29112 | 1 | 1    | 1     | 0    | 0  | 0  | 1  | 0  | 0  | 0.0027    |
| 8                           | IRX1    | irxopods homeobox 1                                                                               | 30369 | 1 | 1    | 1     | 0    | 0  | 0  | 1  | 0  | 0  | 0.78      |
| 9                           | MEITL2A | methyltransferase like 2A                                                                         | 34147 | 1 | 1    | 1     | 0    | 0  | 1  | 0  | 0  | 0  | 0.64      |
| 10                          | TBX1    | T-box 1                                                                                           | 31685 | 1 | 1    | 1     | 0    | 0  | 1  | 0  | 0  | 0  | 0.57      |
| 11                          | POLR3D  | polymerase (RNA) III (DNA directed) polypeptide D, 44kDa                                          | 35121 | 1 | 1    | 1     | 0    | 0  | 1  | 0  | 0  | 0  | 0.60      |
| 12                          | CSH1    | chorionic somatomammotropin hormone 1 (placental lactogen)                                        | 20031 | 1 | 1    | 1     | 0    | 1  | 0  | 0  | 0  | 0  | 0.67      |
| 13                          | OR4K1   | olfactory receptor, family 4, subfamily K, member 1                                               | 30073 | 1 | 1    | 1     | 0    | 1  | 0  | 0  | 0  | 0  | 0.68      |
| 14                          | C9orf26 | chromosome 19 open reading frame 26                                                               | 33839 | 1 | 1    | 1     | 0    | 0  | 0  | 0  | 0  | 1  | 1.00      |
| 15                          | SNNX3   | sorting nexin 33                                                                                  | 55449 | 1 | 1    | 1     | 0    | 0  | 0  | 0  | 1  | 0  | 0.87      |
| 16                          | RBMXL1  |                                                                                                   | 37664 | 1 | 1    | 1     | 0    | 0  | 1  | 0  | 0  | 0  | 0.82      |
| 17                          | OR9A2   | olfactory receptor, family 9, subfamily A, member 2                                               | 29983 | 1 | 1    | 1     | 0    | 0  | 0  | 0  | 1  | 0  | 0.81      |
| 18                          | FCRLB   | Fc receptor-like B                                                                                | 37134 | 1 | 1    | 1     | 0    | 0  | 0  | 1  | 0  | 0  | 0.76      |
| 19                          | MCART1  | mitochondrial carrier triple repeat 1                                                             | 28736 | 1 | 1    | 1     | 0    | 0  | 0  | 0  | 1  | 0  | 0.76      |
| 20                          | HORMAD1 | HORMA domain containing 1                                                                         | 36771 | 1 | 1    | 1     | 0    | 0  | 1  | 0  | 0  | 0  | 0.74      |
| 21                          | RCAN3   | RCAN family member 3                                                                              | 23740 | 1 | 1    | 1     | 0    | 1  | 0  | 0  | 0  | 0  | 0.58      |
| 22                          | GPR85   | G protein-coupled receptor 65                                                                     | 32576 | 1 | 1    | 1     | 0    | 0  | 1  | 0  | 0  | 0  | 0.62      |
| 23                          | OR51G1  | olfactory receptor, family 51, subfamily G, member 1                                              | 30976 | 1 | 1    | 1     | 0    | 1  | 0  | 0  | 0  | 0  | 0.75      |
| 24                          | KHSRP   | KH-type splicing regulatory protein                                                               | 46539 | 1 | 1    | 1     | 0    | 0  | 0  | 0  | 1  | 0  | 0.81      |
| 25                          | CASP4   | caspase 4, apoptosis-related cysteine peptidase                                                   | 37301 | 1 | 1    | 1     | 0    | 1  | 0  | 0  | 0  | 0  | 0.76      |
| 26                          | UCK1    | uridine-cytidine kinase 1                                                                         | 23955 | 1 | 1    | 1     | 0    | 1  | 0  | 0  | 0  | 0  | 0.72      |
| 27                          | FOXH1   | forkhead box H1                                                                                   | 24518 | 1 | 1    | 1     | 0    | 1  | 0  | 0  | 0  | 0  | 0.67      |
| 28                          | CXCR3   | chemokine (C-X-C motif) receptor 3                                                                | 25285 | 1 | 1    | 1     | 0    | 1  | 0  | 0  | 0  | 0  | 0.69      |
| 29                          | C1orf42 | chromosome 11 open reading frame 42                                                               | 32354 | 1 | 1    | 1     | 0    | 0  | 0  | 0  | 0  | 1  | 1.00      |
| 30                          | GABRG1  | gamma-aminobutyric acid (GABA) A receptor, gamma 1                                                | 43924 | 1 | 1    | 1     | 0    | 0  | 0  | 0  | 0  | 1  | 0.75      |

Notes

N = number of sequenced bases in this gene across the individual set

n = number of (nonsilent) mutations in this gene across the individual set

npat = number of patients (individuals) with at least one nonsilent mutation

nsite = number of unique sites having a nonsilent mutation

nsll = number of silent mutations in this gene across the individual set

n1 = number of nonsilent mutations of type "CG->T"

n2 = number of nonsilent mutations of type "Cp(A/C/T)->T"

n3 = number of nonsilent mutations of type "C->(G/A)"

n4 = number of nonsilent mutations of type "A->mut"

n5 = number of nonsilent mutations of type "indel+null"

null = mutation category that includes nonsense, frameshift, splice-site mutations

p\_classic = p-value for the observed amount of nonsilent mutations being elevated in this gene

p\_ns\_s = p-value for the observed nonsilent/silent ratio being elevated in this gene

p = p-value (overall)

q = q-value, False Discovery Rate (Benjamini-Hochberg procedure)

**Figure S5:** MutSig report denoting mutations that are recurrently mutated in the 35 RT, both primary and recurrent samples.

| SIGNIFICANTLY MUTATED GENES |              |                                                                                                   |        |   |      |       |      |    |    |    |    |    |                 |           |
|-----------------------------|--------------|---------------------------------------------------------------------------------------------------|--------|---|------|-------|------|----|----|----|----|----|-----------------|-----------|
| rank                        | gene         | description                                                                                       | N      | n | npat | nsite | nsil | n1 | n2 | n3 | n4 | n5 | p <sub>ns</sub> | q         |
| 1                           | SMARCB1      | SWI/SNF related, matrix associated, actin dependent regulator of chromatin, subfamily b, member 1 | 33518  | 9 | 9    | 8     | 0    | 0  | 0  | 0  | 0  | 9  | 0.047           | <1.00e-11 |
| 2                           | GABRB2       | gamma-aminobutyric acid (GABA) A receptor, beta 2                                                 | 55827  | 2 | 2    | 2     | 0    | 2  | 0  | 0  | 0  | 0  | 0.52            | 0.000083  |
| 3                           | ZNF433       | zinc finger protein 433                                                                           | 74144  | 2 | 2    | 2     | 0    | 1  | 0  | 0  | 0  | 1  | 0.57            | 0.00010   |
| 4                           | PYROXD1      | pyridine nucleotide-disulphide oxidoreductase domain 1                                            | 55660  | 1 | 1    | 1     | 0    | 0  | 0  | 1  | 0  | 0  | 0.90            | 0.00093   |
| 5                           | MRPL53       | mitochondrial ribosomal protein L53                                                               | 12853  | 1 | 1    | 1     | 0    | 0  | 1  | 0  | 0  | 0  | 0.67            | 0.0021    |
| 6                           | MAF          | v-maf musculoaponeurotic fibrosarcoma oncogene homolog (avian)                                    | 24277  | 1 | 1    | 1     | 0    | 0  | 0  | 1  | 0  | 0  | 0.78            | 0.0023    |
| 7                           | AVP          | arginine vasopressin (neurophysin II, antidiuretic hormone, diabetes insipidus, neurohypophysial) | 6310   | 1 | 1    | 1     | 0    | 0  | 1  | 0  | 0  | 0  | 0.67            | 0.0024    |
| 8                           | TRABD        | Trab domain containing                                                                            | 33655  | 1 | 1    | 1     | 0    | 0  | 0  | 1  | 0  | 0  | 0.77            | 0.0031    |
| 9                           | CENPA        | centromere protein A                                                                              | 12351  | 1 | 1    | 1     | 0    | 0  | 1  | 0  | 0  | 0  | 0.71            | 0.0033    |
| 10                          | PSORS1C2     | psoriasis susceptibility 1 candidate 2                                                            | 14267  | 1 | 1    | 1     | 0    | 0  | 1  | 0  | 0  | 0  | 0.77            | 0.0040    |
| 11                          | FAM177A1     |                                                                                                   | 22662  | 1 | 1    | 1     | 0    | 1  | 0  | 0  | 0  | 0  | 0.66            | 0.0046    |
| 12                          | TMED7-TICAM2 |                                                                                                   | 18977  | 1 | 1    | 1     | 0    | 0  | 1  | 0  | 0  | 0  | 0.77            | 0.0047    |
| 13                          | PKHD1        | polycystic kidney and hepatic disease 1 (autosomal recessive)                                     | 453170 | 2 | 2    | 2     | 0    | 0  | 1  | 0  | 1  | 0  | 0.57            | 0.0047    |
| 14                          | IRX3         | irxois homeobox 3                                                                                 | 27660  | 1 | 1    | 1     | 0    | 0  | 0  | 0  | 0  | 1  | 1.00            | 0.0048    |
| 15                          | ST3GAL3      | ST3 beta-galactoside alpha-2,3-sialyltransferase 3                                                | 49697  | 1 | 1    | 1     | 0    | 0  | 0  | 1  | 0  | 0  | 0.82            | 0.0048    |
| 16                          | IL32         | interleukin 32                                                                                    | 19515  | 1 | 1    | 1     | 0    | 1  | 0  | 0  | 0  | 0  | 0.68            | 0.0048    |
| 17                          | Cpofr42      | chromosome 9 open reading frame 142                                                               | 16290  | 1 | 1    | 1     | 0    | 0  | 1  | 0  | 0  | 0  | 0.72            | 0.0048    |
| 18                          | KHSRP        | KH-type splicing regulatory protein                                                               | 52697  | 1 | 1    | 1     | 0    | 0  | 0  | 1  | 0  | 0  | 0.83            | 0.0050    |
| 19                          | ZC3H8        | zinc finger CCH-type containing 8                                                                 | 23289  | 1 | 1    | 1     | 0    | 0  | 0  | 0  | 0  | 1  | 1.00            | 0.0050    |
| 20                          | GDA          | guanine deaminase                                                                                 | 53062  | 1 | 1    | 1     | 0    | 0  | 0  | 1  | 0  | 0  | 0.84            | 0.0052    |
| 21                          | ZC168        |                                                                                                   | 21885  | 1 | 1    | 1     | 0    | 1  | 0  | 0  | 0  | 0  | 0.68            | 0.0055    |
| 22                          | ASB2         | ankyrin repeat and SOCS box-containing 2                                                          | 60379  | 1 | 1    | 1     | 0    | 0  | 0  | 1  | 0  | 0  | 0.78            | 0.0058    |
| 23                          | METTL2A      | methyltransferase like 2A                                                                         | 45195  | 1 | 1    | 1     | 0    | 0  | 1  | 0  | 0  | 0  | 0.74            | 0.0058    |
| 24                          | SSBP3        | single stranded DNA binding protein 3                                                             | 33982  | 1 | 1    | 1     | 0    | 0  | 0  | 0  | 1  | 0  | 0.75            | 0.0058    |
| 25                          | IRX1         | irxois homeobox 1                                                                                 | 35022  | 1 | 1    | 1     | 0    | 0  | 1  | 0  | 0  | 0  | 0.70            | 0.0060    |
| 26                          | PLUNC        | palate, lung and nasal epithelium associated                                                      | 29563  | 1 | 1    | 1     | 0    | 0  | 1  | 0  | 0  | 0  | 0.66            | 0.0064    |
| 27                          | Cpof40       | chromosome 5 open reading frame 40                                                                | 25123  | 1 | 1    | 1     | 0    | 0  | 1  | 0  | 0  | 0  | 0.70            | 0.0064    |
| 28                          | CSH1         | chorionic somatomammotropin hormone 1 (placental lactogen)                                        | 23341  | 1 | 1    | 1     | 0    | 1  | 0  | 0  | 0  | 0  | 0.71            | 0.0065    |
| 29                          | NKZF3        | nuclear receptor subfamily 2, group E, member 3                                                   | 22802  | 1 | 1    | 1     | 0    | 1  | 0  | 0  | 0  | 0  | 0.66            | 0.0066    |
| 30                          | SSX5         | synovial sarcoma, X breakpoint 5                                                                  | 26666  | 1 | 1    | 1     | 0    | 1  | 0  | 0  | 0  | 0  | 0.73            | 0.0066    |

**Figure S6:** dRanger WES detected 10kb tandem duplication from cluster of 21 read pairs of everted orientation spanning from the 3' end of exon 3 to the middle of exon 5.

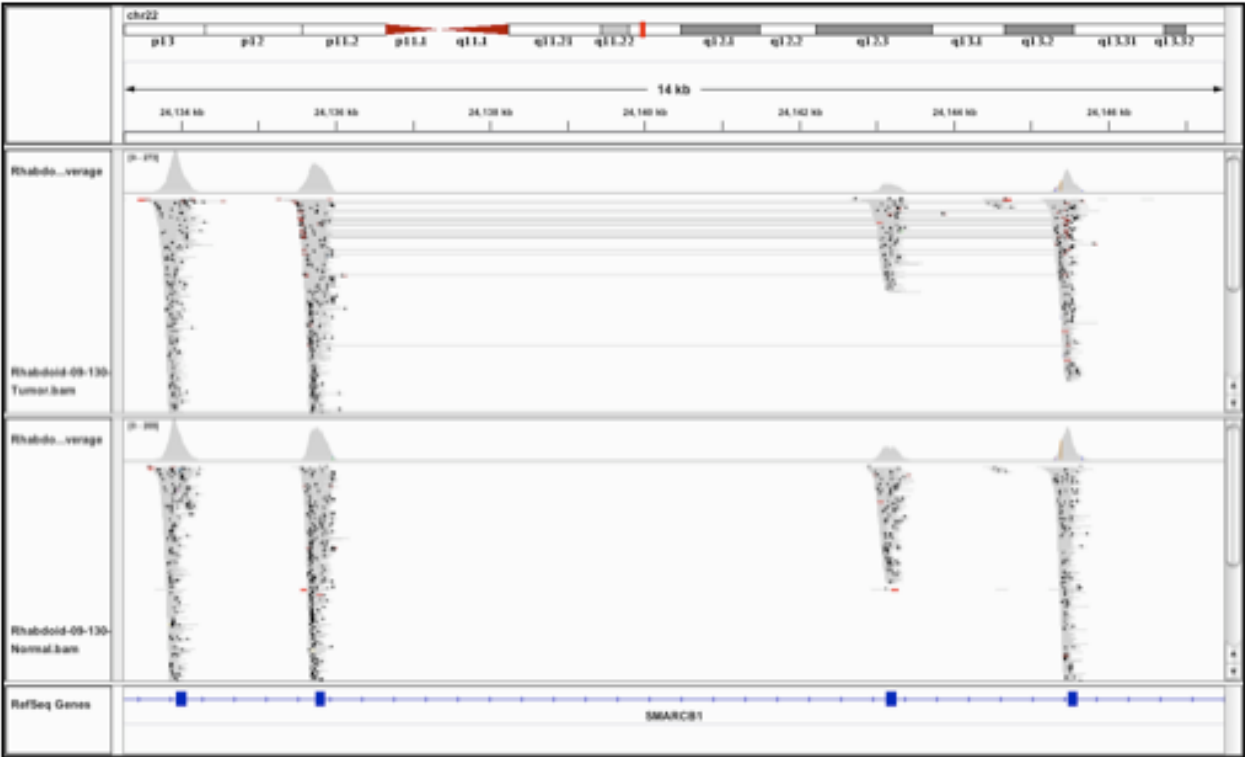

**Figure S7:** The 13 base pair tandem duplication in *SMARCB1* was not called by any of the detection algorithms in the Firehose pipeline. A closer examination of this locus led to the discovery that many of the reads in this region were subjected to soft clipping during sequence alignment. Soft clipped reads are depicted in color. Without the soft clipped reads included the mutation had a low allele fraction (AF=0.27). However, once all soft clipped reads that contain the mutation are included, then AF=0.85.

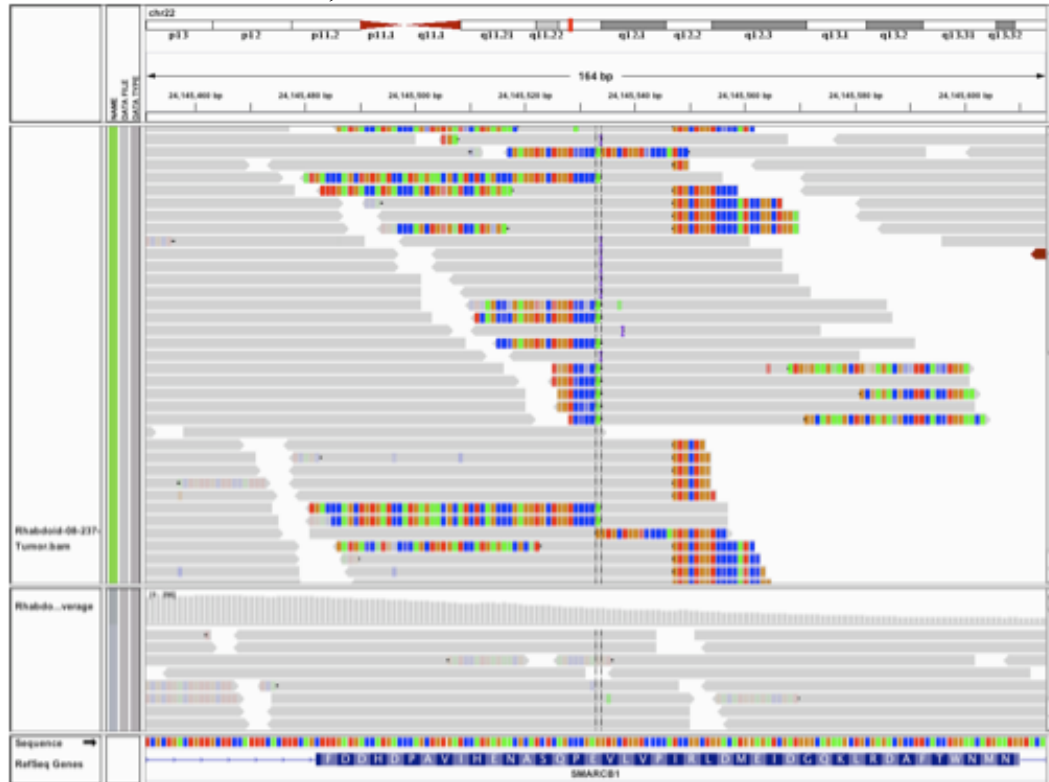

**Table S1:** Clinical Information for Primary Samples

| <b>Sample</b> | <b>Age (months)</b> | <b>Sex</b> | <b>Tissue Site</b> |
|---------------|---------------------|------------|--------------------|
| 07-057        | 8                   | Male       | Retroperitoneal    |
| 07-221        | 3                   | Female     | Brain              |
| 07-242A       | 12                  | Male       | Kidney             |
| 07-295        | 12                  | Male       | Brain              |
| 08-114        | 12                  | Male       | Brain              |
| 08-129        | 19                  | Male       | Brain              |
| 08-172        | 6                   | Female     | Brain              |
| 08-230        | 12                  | Male       | Brain              |
| 08-237        | 12                  | Male       | Brain              |
| 08-262A       | NaN                 | Male       | Kidney             |
| 08-310        | 36                  | Female     | Brain              |
| 09-125        | 26                  | Female     | Brain              |
| 09-130        | 7                   | Male       | Thoracic           |
| 09-131        | 2.5                 | Male       | Brain              |
| 09-182        | 60                  | Female     | Brain              |
| 09-223        | 1                   | Female     | Brain              |
| 09-236        | 24                  | Female     | Supraclavicular    |
| 09-365        | 22                  | Male       | Brain              |
| 10-012        | 6                   | Female     | Liver              |
| 10-016        | 6                   | Male       | Brain              |
| 10-031        | 7                   | Female     | Paraspinal         |
| 10-155        | 48                  | Male       | Brain              |
| 10-162        | 21                  | Male       | Brain              |
| 10-201        | 12                  | Female     | Brain              |
| 10-213        | 14                  | Female     | Brain              |
| 10-255        | 12                  | Male       | Brain              |
| 10-305B       | 36                  | Male       | Bladder            |
| 10-330        | 5                   | Male       | Brain              |
| 10-355        | 8                   | Female     | Bladder            |
| 10-407        | NaN                 | Female     | Kidney             |
| SJDOS006      | 0.25                | Female     | Soft tissue        |
| SJDOS008      | 12                  | Male       | Soft tissue        |

**Table S2:** Tumor purity and associated metrics for primary RT

| <b>Sample</b> | <b>Purity</b> | <b>Ploidy</b> | <b>Genome doublings</b> | <b>Coverage for 80% power</b> | <b>Cancer DNA fraction</b> | <b>Subclonal genome fraction</b> |
|---------------|---------------|---------------|-------------------------|-------------------------------|----------------------------|----------------------------------|
| 10-012        | 0.75          | 2             | 0                       | 11                            | 0.75                       | 0                                |
| 08-237        | 0.95          | 1.99          | 0                       | 8                             | 0.95                       | 0                                |
| 08-230        | 0.94          | 1.99          | 0                       | 8                             | 0.94                       | 0                                |
| 08-172        | 0.91          | 1.99          | 0                       | 9                             | 0.91                       | 0                                |
| 07-295        | 0.97          | 1.99          | 0                       | 8                             | 0.97                       | 0                                |
| 10-016        | 0.94          | 1.99          | 0                       | 8                             | 0.93                       | 0                                |
| 10-162        | 0.97          | 1.99          | 0                       | 8                             | 0.97                       | 0.02                             |
| 10-305B       | 0.86          | 2             | 0                       | 9                             | 0.86                       | 0                                |
| 10-201        | 0.78          | 2             | 0                       | 10                            | 0.78                       | 0                                |
| 09-236        | 0.88          | 2             | 0                       | 9                             | 0.88                       | 0                                |
| 08-262A       | 0.61          | 2             | 0                       | 13                            | 0.61                       | 0.01                             |
| 08-114        | 0.81          | 1.99          | 0                       | 10                            | 0.8                        | 0                                |
| 07-221        | 0.95          | 2             | 0                       | 8                             | 0.95                       | 0                                |
| 10-213        | 0.7           | 1.99          | 0                       | 11                            | 0.7                        | 0                                |
| 10-155        | 0.75          | 1.99          | 0                       | 11                            | 0.75                       | 0                                |
| 10-255        | 0.76          | 1.99          | 0                       | 11                            | 0.75                       | 0                                |
| 09-130        | 0.59          | 2             | 0                       | 14                            | 0.59                       | 0                                |
| 09-131        | 0.87          | 1.99          | 0                       | 9                             | 0.87                       | 0                                |
| 09-182        | 0.7           | 2             | 0                       | 11                            | 0.7                        | 0                                |
| 09-125        | 0.64          | 1.99          | 0                       | 13                            | 0.64                       | 0                                |
| 10-031        | 0.83          | 1.99          | 0                       | 9                             | 0.83                       | 0                                |
| 07-242A       | 0.79          | 2             | 0                       | 10                            | 0.79                       | 0                                |
| 09-365        | 0.71          | 1.99          | 0                       | 11                            | 0.7                        | 0.02                             |
| 08-129        | 0.97          | 2             | 0                       | 8                             | 0.97                       | 0.03                             |
| SJDOS008      | 0.43          | 2             | 0                       | 19                            | 0.43                       | 0.02                             |
| 08-067        | 0.48          | 2             | 0                       | 17                            | 0.48                       | 0.09                             |
| 08-310        | 0.77          | 2             | 0                       | 10                            | 0.77                       | 0                                |
| 10-330        | 0.89          | 1.99          | 0                       | 9                             | 0.89                       | 0                                |
| 10-407        | 0.94          | 2             | 0                       | 8                             | 0.94                       | 0                                |
| 10-355        | 0.59          | 2             | 0                       | 14                            | 0.59                       | 0                                |
| SJDOS006      | 0.96          | 2             | 0                       | 8                             | 0.96                       | 0                                |
| 09-223        | 0.95          | 2             | 0                       | 8                             | 0.95                       | 0.22                             |



**Table S3:** Sequence coverage for primary RT

| <b>Sample</b> | <b>Total exome (bp)</b> | <b>Tumor base coverage</b> | <b>Normal base coverage</b> | <b>Callable exome (bp)</b> | <b>Callable exome (%)</b> |
|---------------|-------------------------|----------------------------|-----------------------------|----------------------------|---------------------------|
| 07-057        | 32575120                | 93.11                      | 101.49                      | 29090323                   | 89.30                     |
| 07-221        | 32575120                | 97.53                      | 99.34                       | 28674802                   | 88.03                     |
| 07-242A       | 32575120                | 94.41                      | 94.65                       | 29171083                   | 89.55                     |
| 07-295        | 32575120                | 96.18                      | 86.16                       | 28606059                   | 87.82                     |
| 08-114        | 32575120                | 95.21                      | 96.96                       | 28652595                   | 87.96                     |
| 08-129        | 32575120                | 97.54                      | 92.83                       | 29130533                   | 89.43                     |
| 08-172        | 32575120                | 97.01                      | 93.18                       | 28718918                   | 88.16                     |
| 08-230        | 32575120                | 97.59                      | 83.81                       | 28597836                   | 87.79                     |
| 08-237        | 32575120                | 92.44                      | 94.58                       | 28599461                   | 87.80                     |
| 08-262A       | 32575120                | 87.57                      | 85.17                       | 28451715                   | 87.34                     |
| 08-310        | 32575120                | 101.29                     | 92.10                       | 29274221                   | 89.87                     |
| 09-125        | 32575120                | 93.54                      | 86.91                       | 29052057                   | 89.18                     |
| 09-130        | 32575120                | 88.52                      | 89.74                       | 28543412                   | 87.62                     |
| 09-131        | 32575120                | 94.98                      | 98.96                       | 28614443                   | 87.84                     |
| 09-182        | 32575120                | 91.89                      | 84.35                       | 29043031                   | 89.16                     |
| 09-223        | 32575120                | 84.02                      | 96.68                       | 28768028                   | 88.31                     |
| 09-236        | 32575120                | 85.94                      | 92.82                       | 28597647                   | 87.79                     |
| 09-365        | 32575120                | 93.94                      | 99.89                       | 29074930                   | 89.26                     |
| 10-012        | 32575120                | 91.32                      | 96.89                       | 28598726                   | 87.79                     |
| 10-016        | 32575120                | 61.67                      | 69.18                       | 28032023                   | 86.05                     |
| 10-031        | 32575120                | 93.15                      | 98.85                       | 29127260                   | 89.42                     |
| 10-155        | 32575120                | 61.48                      | 60.27                       | 27952499                   | 85.81                     |
| 10-162        | 32575120                | 66.54                      | 68.54                       | 28157850                   | 86.44                     |
| 10-201        | 32575120                | 61.24                      | 58.13                       | 28014455                   | 86.00                     |
| 10-213        | 32575120                | 65.77                      | 59.82                       | 28183675                   | 86.52                     |
| 10-255        | 32575120                | 62.85                      | 53.55                       | 28049663                   | 86.11                     |
| 10-305B       | 32575120                | 61.95                      | 56.94                       | 28054399                   | 86.12                     |
| 10-330        | 32575120                | 66.57                      | 66.14                       | 28197410                   | 86.56                     |
| 10-355        | 32575120                | 62.75                      | 63.56                       | 28150540                   | 86.42                     |
| 10-407        | 32575120                | 73.51                      | 69.81                       | 28382392                   | 87.13                     |
| SJDOS006      | 32575120                | 82.88                      | 82.21                       | 28635705                   | 87.91                     |
| SJDOS008      | 32575120                | 74.18                      | 81.50                       | 28513408                   | 87.53                     |
| Average       | 32575120                | 83.39                      | 82.97                       | 28584722                   | 87.75                     |
| Median        | 32575120                | 89.92                      | 86.53                       | 28599094                   | 87.79                     |

**Table S4: *SMARCB1* mutations in primary RT**

| Sample   | <i>SMARCB1</i>    |                                            |                   |                 |                                                              |
|----------|-------------------|--------------------------------------------|-------------------|-----------------|--------------------------------------------------------------|
|          | Somatic Mutation* | Germline Mutation*                         | Arm-level CNVs    | Array Focal CNV | Seq Focal CNV                                                |
| 07-057   | 0                 | 0                                          | -                 | NaN             | 0 (exons 1-9)†                                               |
| 07-221   | 0                 | 0                                          | -                 | 0               | 3 (exon 1), 2 (exons 2-6), 0 (exons 7-9)                     |
| 07-242A  | 0                 | c.751delG                                  | -                 | NaN             | 2 (CN-LOH)                                                   |
| 07-295   | 0                 | 0                                          | monosomy 22q      | 0               | 0 (exons 1-9)                                                |
| 08-114   | 0                 | 0                                          | monosomy 22q      | 0               | 0 (exons 1-9)                                                |
| 08-129   | c.118C>T          | 0                                          | -                 | NaN             | 2 (CN-LOH)                                                   |
| 08-172   | 0                 | 0                                          | monosomy 22q      | 0               | 1 (exons 1-5), 0 (exons 6-9)                                 |
| 08-230   | 0                 | 0                                          | monosomy 22q      | 0               | 0 (exons 1-9)                                                |
| 08-237   | c.553-565dup13    | 0                                          | monosomy 22q      | 1               | 1 (exons 1-9)                                                |
| 08-262A  | 0                 | del 1-9                                    | -                 | 0               | 0 (exons 1-9)                                                |
| 08-310   | 0                 | g.24167603 (Splice donor after exon 7)     | -                 | NaN             | 2 (CN-LOH)                                                   |
| 09-125   | c.1145delC        | 0                                          | monosomy 22q      | NaN             | 1 (exons 1-9)                                                |
| 09-130   | 0                 | 0                                          | -                 | 2               | 1 (exons 4-5), 3+ (exon 9)<br>Tandem duplication (exons 3-5) |
| 09-131   | 0                 | c.93G>C                                    | monosomy 22q      | 1               | 1 (exons 1-9)                                                |
| 09-182   | 0                 | 0                                          | -                 | NaN             | 0 (exons 1-9)                                                |
| 09-223   | 0                 | c.601C>T                                   | -                 | NaN             | 1 (exons 1-9)                                                |
| 09-236   | 0                 | 0                                          | monosomy 22q11-12 | 0               | 0 (exons 1-6), 1 (exons 7-9)                                 |
| 09-365   | 0                 | 0                                          | monosomy 22q12-13 | NaN             | 0 (exons 1-9)                                                |
| 10-012   | 0                 | 0                                          | monosomy 22q11    | 0               | 0 (exons 1-9)                                                |
| 10-016   | 0                 | c.472C>T                                   | monosomy 22q      | 1               | 1 (exons 1-9)                                                |
| 10-031   | 0                 | 0                                          | monosomy 22q11-12 | NaN             | 0 (exons 1-9)                                                |
| 10-155   | c.1145delC**      | 0                                          | monosomy 22q      | 1               | 1 (exons 1-9)                                                |
| 10-162   | c.118C>T          | 0                                          | monosomy 22q      | 1               | 1 (exons 1-9)                                                |
| 10-201   | 0                 | 0                                          | -                 | 0               | 2 (exon 1), 3? (exon 2), 1 (exons 3-4), 0 (exons 5-9)        |
| 10-213   | c.157C>T          | 0                                          | monosomy 22q      | 1               | 1 (exons 1-9)                                                |
| 10-255   | c.778C>T          | 0                                          | monosomy 22q      | 1               | 1 (exons 1-9)                                                |
| 10-305B  | 0                 | 0                                          | monosomy 22q11    | 0               | 0 (exons 1-9)                                                |
| 10-330   | c.618G>A          | 0                                          | monosomy 22q      | NaN             | 1 (exons 1-9)                                                |
| 10-355   | 0                 | g.24133941 (Splice acceptor before exon 2) | -                 | NaN             | 2 (CN-LOH?), 0 (exon 9)                                      |
| 10-407   | 0                 | 0                                          | monosomy 22q12    | NaN             | 0 (exons 1-9)                                                |
| SJDOS006 | 0                 | 0                                          | monosomy 22q11    | NaN             | 0 (exons 1-9)                                                |
| SJDOS008 | c.197-198insA     | 0                                          | -                 | NaN             | 2 (CN-LOH?)                                                  |

\*Using CCDS13817

\*\*Mutation appears in MLPA/Sanger, but the 9th exon has low coverage in exome sequencing, and the mutation appears in 1 of 8 reads.

†Homozygous deletion by FISH, but heterozygous by sequencing.

**Table S5:** Mutation multiplicity in primary RT

| <b>Sample</b> | <b>Mult&lt;0.75</b> | <b>0.75≤Mult&lt;1.5</b> | <b>Mult≥1.5</b>       |
|---------------|---------------------|-------------------------|-----------------------|
| 07-057        | 3                   | 0                       | 0                     |
| 07-221        | 1                   | 0                       | 0                     |
| 07-242A       | 2                   | 6                       | 0                     |
| 07-295        | 4                   | 1                       | 0                     |
| 08-114        | 0                   | 0                       | 0                     |
| 08-129        | 7                   | 2                       | <i>SMARCB1</i>        |
| 08-172        | 4                   | 0                       | 0                     |
| 08-230        | 2                   | 3                       | 0                     |
| 08-237        | 0                   | 6                       | 0                     |
| 08-262A       | 1                   | 2                       | 0                     |
| 08-310        | 1                   | 4                       | 0                     |
| 09-125        | 1                   | 7                       | <i>PHF2</i>           |
| 09-130        | 3                   | 3                       | 0                     |
| 09-131        | 4                   | 0                       | 0                     |
| 09-182        | 0                   | 3                       | 0                     |
| 09-223        | 0                   | 0                       | 0                     |
| 09-236        | 2                   | 5                       | <i>MUC4</i>           |
| 09-365        | 2                   | 7                       | 0                     |
| 10-012        | 1                   | 2                       | 0                     |
| 10-016        | 2                   | 0                       | 0                     |
| 10-031        | 1                   | 4                       | 0                     |
| 10-155        | 0                   | 3                       | <i>PREX1</i> (Silent) |
| 10-162        | 7                   | 1                       | 0                     |
| 10-201        | 3                   | 4                       | 0                     |
| 10-213        | 5                   | 2                       | 0                     |
| 10-255        | 0                   | 2                       | 0                     |
| 10-305B       | 3                   | 10                      | 0                     |
| 10-330        | 0                   | 6                       | 0                     |
| 10-355        | 1                   | 3                       | 0                     |
| 10-407        | 6                   | 2                       | 0                     |
| SJDOS006      | 3                   | 2                       | 0                     |
| SJDOS008      | 2                   | 6                       | <i>SMARCB1</i>        |
| Total         | 71                  | 90                      | 11                    |

**Table S6:** Clinical information for recurrent samples

| <b>Sample</b> | <b>Age (months)</b> | <b>Sex</b> | <b>Tissue Site</b> |
|---------------|---------------------|------------|--------------------|
| 09-044        | 9                   | Female     | Brain              |
| 09-046A       | 12                  | Female     | Brain              |
| 08-067        | 72                  | Male       | Kidney             |

**Table S7:** Tumor purity and associated metrics for recurrent RT

| <b>Sample</b> | <b>Purity</b> | <b>Ploidy</b> | <b>Genome doublings</b> | <b>Coverage for 80% power</b> | <b>Cancer DNA fraction</b> | <b>Subclonal genome fraction</b> |
|---------------|---------------|---------------|-------------------------|-------------------------------|----------------------------|----------------------------------|
| 09-044        | 0.9           | 2.14          | 0                       | 9                             | 0.91                       | 0.17                             |
| 08-067        | 0.48          | 2             | 0                       | 17                            | 0.48                       | 0.09                             |
| 09-046A       | 0.9           | 1.99          | 0                       | 9                             | 0.9                        | 0                                |

**Table S8:** Sequence coverage for recurrent RT

| <b>Sample</b> | <b>Total exome (bp)</b> | <b>Tumor base coverage</b> | <b>Normal base coverage</b> | <b>Callable exome (bp)</b> |
|---------------|-------------------------|----------------------------|-----------------------------|----------------------------|
| 08-067        | 32575120                | 98.51                      | 93.95                       | 29031049                   |
| 09-044        | 32575120                | 89.62                      | 91.21                       | 28355139                   |
| 09-046A       | 32575120                | 82.94                      | 97.02                       | 28326710                   |
| Average       | 32575120                | 90                         | 94                          | 28570966                   |
| Median        | 32575120                | 90                         | 94                          | 28355139                   |

**Table S9:** Summary of somatic mutation types in recurrent RT

| <b>Sample</b> | <b>Silent</b> | <b>Missense</b> | <b>Nonsense</b> | <b>Indel</b> | <b>Splice Site</b> | <b>Total</b> | <b>Rate per Mb</b> |
|---------------|---------------|-----------------|-----------------|--------------|--------------------|--------------|--------------------|
| 08-067        | 14            | 30              | 1               | 0            | 2                  | 47           | 1.64               |
| 09-044        | 12            | 32              | 1               | 1            | 1                  | 47           | 1.64               |
| 09-046A       | 10            | 24              | 3               | 1            | 0                  | 38           | 1.33               |
| Total         | 36            | 86              | 5               | 2            | 3                  | 132          |                    |
| Mean          | 12.00         | 28.67           | 1.67            | 0.67         | 1.00               | 44.00        | 1.53               |
| Median        | 12            | 30              | 1               | 1            | 1                  | 47           | 1.64               |

**Table S10:** *SMARCB1* mutations in recurrent RT

| Sample  | <i>SMARCB1</i>    |                    |                |                 |               |
|---------|-------------------|--------------------|----------------|-----------------|---------------|
|         | Somatic Mutation* | Germline Mutation* | Arm-level CNVs | Array Focal CNV | Seq Focal CNV |
| 08-067  | 0                 | c.601C>T**         | -              | NaN             | 2 (CN-LOH?)   |
| 09-044  | 0                 | c.141C>A           | -              | 1               | 2 (CN-LOH)    |
| 09-046A | c.472C>T          | 0                  | monosomy 22q   | 1               | 1 (exons 1-9) |

\*Using CCDS13817

\*\*Mutant allele present in only 2% of normal reads; however, second tumor in patient found to harbor the same mutation by MLPA/Sanger, so germline mutation deemed likely.

**Table S11:** Mutation multiplicity in recurrent RT

| Sample  | Mult<0.75 | 0.75<=Mult<1.5 | Mult>=1.5      |
|---------|-----------|----------------|----------------|
| 08-067  | 20        | 26             | <i>SMARCB1</i> |
| 09-044  | 43        | 4              | 0              |
| 09-046A | 30        | 8              | 0              |
| Total   | 93        | 36             | 3              |

**Table S12:** MAF file containing information on all mutations detected in 35 RT whole exome sequencing. See attached Excel file.
